# Supplementary material for: Constructing a prognostic tool for predicting the risk of non-adherence to antiplatelet therapy in discharged patients with coronary heart disease: a retrospective cohort study
Source: PeerJ. 2023 Aug 9;11:e15876. doi: 10.7717/peerj.15876 (PMC10422952; doi:10.7717/peerj.15876)
Supplement: Data S1 [file peerj-11-15876-s001.xls]

## Sheet: Sheet1
id	Gender	Age	Educational level	Medical payment method	Number of combined risk factors	PCI or not	Type of coronary heart disease	BMI	Occupational status	Type of drugs taken at discharge	Outcome	Duration of antiplatelet medication
1	0	61	2	1	1	1	3	17.3846	0	0	1	3
2	1	60	1	2	3	0	1	26.0216	1	1	1	3
3	1	41	1	2	3	1	3	20.6547	0	0	0	3
4	1	63	2	1	2	1	2	24.132	0	1	0	3
5	1	63	1	2	2	1	2	21.702	0	1	1	2
6	1	63	1	1	3	1	2	22.0596	0	1	1	2
7	1	62	1	0	2	1	1	20.6845	1	0	0	3
8	1	70	2	2	1	0	1	25.923	1	1	0	3
9	1	65	2	2	3	0	1	21.7841	1	1	1	1
10	0	67	3	1	1	1	2	23.9244	1	0	0	1
11	1	68	2	2	0	1	1	18.0055	0	0	0	2
12	0	65	1	1	0	1	2	22.1907	0	0	0	3
13	1	65	1	1	3	1	1	23.4899	0	1	1	2
14	0	61	1	2	0	1	2	22.214	0	1	0	2
15	1	62	1	0	1	1	2	24.4802	0	1	0	2
16	1	68	3	2	1	1	2	28.422	0	0	0	2
17	1	66	3	2	1	0	3	17.6605	0	1	0	2
18	1	59	1	1	3	0	2	21.8111	0	0	1	3
19	1	35	2	1	2	1	3	24.3485	1	0	0	2
20	1	73	1	0	1	1	1	25.146	0	0	0	2
21	1	62	3	1	1	1	1	26.1772	0	1	0	2
22	1	72	1	1	2	0	1	20.5473	1	0	0	1
23	1	47	3	2	1	1	2	21.5689	0	0	0	3
24	1	68	1	1	2	1	1	24.4044	0	1	0	2
25	0	65	1	2	4	0	3	23.2235	0	1	1	3
26	0	68	3	2	1	1	1	17.3109	0	1	0	1
27	1	66	3	2	2	1	1	19.5704	0	1	1	2
28	1	67	1	2	1	0	2	18.5379	0	1	1	3
29	0	60	2	0	2	1	2	18.2236	0	0	0	2
30	1	65	3	2	2	0	1	17.8061	0	0	0	1
31	1	67	1	1	3	1	2	22.774	0	1	1	2
32	1	65	1	0	1	1	1	19.2424	1	0	0	3
33	1	67	3	1	3	1	1	30.5371	0	0	0	3
34	1	66	1	2	3	1	3	18.503	1	1	1	3
35	1	60	1	2	2	1	3	27.6601	0	1	1	2
36	1	65	1	1	2	1	2	17.8525	0	1	0	2
37	1	56	2	1	0	1	3	21.6485	1	1	0	2
38	1	65	1	0	3	0	1	22.8573	1	1	1	3
39	0	73	3	2	2	1	1	20.5451	0	0	0	3
40	1	63	1	2	1	0	2	16.4769	0	0	0	1
41	0	61	1	1	2	1	2	25.2636	0	1	1	3
42	1	68	3	1	1	1	3	22.3328	0	0	0	3
43	1	63	3	1	1	1	2	22.5729	0	1	0	1
44	1	59	2	1	2	1	3	25.3464	0	0	0	1
45	0	34	1	2	4	0	1	23.2119	1	0	1	1
46	1	63	1	1	0	1	1	20.7037	0	0	0	1
47	1	62	3	1	1	1	2	16.9026	0	1	0	3
48	1	50	1	0	1	1	3	21.9592	0	0	0	1
49	1	70	3	1	3	1	2	23.3346	0	1	0	3
50	0	34	1	1	3	0	2	22.0078	1	0	1	3
51	1	60	3	0	2	1	3	21.1555	0	0	0	2
52	1	50	1	1	0	1	2	19.2023	1	0	0	3
53	0	67	2	1	1	1	3	16.4746	0	0	0	2
54	1	72	1	1	1	1	1	25.4073	1	1	0	1
55	1	34	1	2	3	0	2	16.6432	0	1	1	3
56	0	64	3	2	0	0	2	22.197	0	0	0	2
57	1	61	3	1	1	1	2	21.8739	0	0	0	2
58	0	62	2	0	1	1	1	14.0912	0	1	0	2
59	1	59	3	2	1	1	2	22.3125	0	1	0	1
60	1	63	1	2	4	1	3	24.4633	1	1	1	1
61	1	61	2	2	1	0	3	21.0027	1	0	0	3
62	0	62	3	1	1	1	2	17.617	0	0	0	2
63	1	64	1	2	1	1	3	18.7797	1	1	0	3
64	0	56	1	1	0	1	2	19.2247	0	1	0	1
65	0	42	3	1	1	1	2	24.2402	0	1	0	1
66	1	65	1	1	0	1	2	25.7824	1	1	0	2
67	1	50	3	2	0	1	2	23.7464	0	0	0	2
68	1	47	1	2	1	1	2	18.9209	0	0	0	3
69	0	61	1	1	4	1	3	22.2964	1	1	1	2
70	0	50	1	2	2	1	1	23.6029	0	0	0	2
71	0	66	1	2	3	0	1	22.1981	0	1	1	3
72	1	54	2	1	4	0	1	22.3053	0	1	0	1
73	1	51	2	1	2	1	3	24.368	0	1	0	2
74	1	62	2	0	3	1	2	20.8457	1	0	0	2
75	1	65	3	0	0	1	2	25.2715	0	0	1	3
76	1	59	3	1	3	1	1	25.2976	1	1	0	1
77	1	60	2	0	1	1	2	14.0025	0	1	0	2
78	0	66	1	2	4	1	1	17.9054	0	1	1	2
79	0	66	2	1	1	1	3	20.7398	0	0	0	3
80	1	59	3	1	3	1	1	17.563	0	0	0	1
81	1	70	1	1	4	0	3	23.0915	1	0	1	3
82	1	31	1	1	1	1	2	15.5374	0	1	0	1
83	1	59	2	1	1	1	2	20.2323	0	1	0	2
84	0	61	2	1	2	1	1	21.5364	0	0	0	2
85	0	48	1	1	0	1	3	17.205	0	0	0	2
86	1	48	2	2	0	1	2	20.0248	0	1	0	2
87	1	66	2	1	1	0	3	18.3476	0	1	0	2
88	1	60	2	2	3	1	3	21.0156	0	1	1	3
89	1	61	1	2	4	1	2	20.9944	0	1	0	3
90	1	61	1	2	1	1	3	23.2145	1	1	0	1
91	0	56	2	2	1	1	2	21.3626	0	0	0	2
92	0	59	3	0	1	1	3	20.1576	0	0	0	2
93	1	71	1	2	0	1	2	18.945	0	0	0	3
94	1	33	1	0	1	1	2	17.4829	1	1	0	2
95	1	58	2	1	0	1	2	23.0161	0	1	0	1
96	0	47	1	2	4	1	1	23.7359	0	1	1	3
97	1	57	1	2	1	1	3	17.1466	0	0	0	2
98	1	44	1	1	4	1	1	19.4033	1	0	0	1
99	1	73	1	2	1	0	2	23.7823	0	1	0	2
100	1	62	1	2	4	0	1	23.6215	0	1	1	3
101	1	62	1	2	1	0	3	20.44	0	1	0	1
102	1	69	1	1	1	1	2	23.1967	0	1	0	2
103	1	59	1	1	2	1	2	24.4047	1	0	0	2
104	1	35	2	2	0	1	2	22.6504	1	1	0	1
105	0	63	2	2	3	1	2	14.4181	1	1	1	1
106	0	63	3	2	0	1	2	24.6392	1	1	0	2
107	1	38	1	2	4	1	1	23.4635	0	0	1	2
108	1	59	1	2	1	0	3	21.1367	0	1	0	2
109	1	55	1	2	1	1	2	19.0434	0	1	0	1
110	1	70	2	0	1	0	2	21.6026	0	1	0	1
111	1	72	1	2	4	1	2	21.6264	0	1	0	3
112	0	59	1	1	1	1	1	17.3439	0	1	0	2
113	1	63	2	1	4	1	2	21.0376	0	1	1	3
114	1	66	2	1	4	1	3	24.6161	0	1	1	2
115	1	33	1	2	3	1	2	18.173	1	1	0	1
116	0	55	2	0	2	1	2	21.2586	0	1	0	3
117	0	64	2	0	0	1	2	21.2391	0	1	0	1
118	1	62	1	2	2	0	2	20.2832	0	1	1	3
119	1	67	1	2	4	1	1	27.8745	0	1	1	3
120	0	52	2	2	3	1	2	20.9956	0	0	0	3
121	1	49	2	2	2	0	1	18.9264	0	1	0	2
122	0	51	2	0	1	1	1	19.2552	0	1	0	2
123	1	52	1	1	3	1	2	20.4983	0	0	0	1
124	1	40	1	1	3	1	3	21.6486	0	1	0	2
125	1	35	2	1	1	1	1	23.7845	1	0	0	1
126	0	61	2	1	3	1	2	21.5354	0	1	0	3
127	0	69	1	1	4	1	2	23.0546	1	1	1	3
128	1	60	1	0	0	1	3	19.0526	1	1	1	1
129	0	71	1	2	1	1	2	20.3049	0	1	0	2
130	1	61	1	1	2	1	2	21.6997	0	0	1	3
131	1	68	1	2	0	1	2	20.0926	0	1	0	2
132	1	70	3	1	2	1	2	22.1507	0	1	0	1
133	0	66	1	2	4	1	3	25.349	1	1	1	3
134	1	63	1	2	1	0	2	21.5539	0	0	0	2
135	1	68	1	2	3	1	3	21.915	0	0	1	1
136	1	68	1	1	2	1	1	21.6427	1	1	0	3
137	1	63	2	1	0	1	2	16.373	0	0	0	2
138	1	71	2	1	1	1	1	21.013	1	1	0	2
139	1	57	1	1	1	1	3	15.4011	0	0	0	1
140	1	56	1	1	1	1	2	20.0024	0	1	0	2
141	0	67	1	1	3	1	2	24.2808	0	1	1	2
142	1	51	1	1	3	1	2	25.9801	1	1	0	2
143	1	54	1	1	2	1	2	20.7175	0	1	0	3
144	1	65	1	1	3	0	2	20.1976	0	1	1	3
145	0	67	2	2	0	1	2	19.2199	0	1	0	3
146	1	71	2	1	2	1	2	19.9917	0	1	0	2
147	0	59	2	2	3	1	2	22.7925	0	1	1	2
148	1	73	1	2	1	0	2	17.6226	1	0	0	1
149	1	68	2	1	4	1	1	23.6057	0	0	1	3
150	1	41	2	2	1	1	2	19.7907	1	1	0	1
151	1	73	1	0	2	1	2	21.6572	0	0	0	2
152	0	63	2	1	0	1	1	18.6839	1	1	0	2
153	1	71	1	1	2	1	2	23.0878	0	0	0	1
154	1	54	1	2	2	1	2	16.5517	0	1	0	2
155	0	73	1	0	2	1	2	21.9596	0	1	0	3
156	0	71	2	2	4	1	2	19.7976	1	0	0	2
157	1	66	1	1	2	1	1	24.3759	0	0	0	3
158	1	61	1	0	1	0	2	18.3619	0	0	0	2
159	1	64	3	1	4	1	1	25.3461	0	1	0	3
160	1	66	1	2	2	1	2	23.5922	1	0	1	3
161	1	35	2	1	2	1	2	19.4148	0	1	0	1
162	1	49	1	1	3	0	2	26.164	0	1	0	2
163	0	49	2	1	1	1	1	27.4862	0	0	0	3
164	0	70	1	1	4	1	3	16.1083	1	0	0	2
165	1	42	1	1	1	1	2	22.72	1	0	0	1
166	1	42	1	1	2	1	1	24.2277	0	1	0	2
167	0	67	1	1	2	1	2	21.1104	0	1	0	2
168	1	65	2	0	1	1	2	18.1233	0	1	0	2
169	1	41	1	1	0	0	1	25.8731	1	1	0	1
170	1	62	1	1	0	1	3	20.1179	0	1	0	3
171	1	61	3	1	2	1	2	19.512	0	1	0	1
172	1	50	1	1	2	1	3	26.8089	0	1	0	2
173	1	70	3	1	4	1	2	23.4745	0	0	0	3
174	1	64	1	0	3	1	3	16.0533	0	1	1	3
175	1	51	2	2	0	1	1	15.686	0	1	0	1
176	1	62	1	2	3	0	3	21.7586	1	1	1	3
177	0	43	1	1	1	1	2	24.5857	0	1	0	1
178	0	66	1	2	4	1	2	22.2805	0	0	1	3
179	1	55	2	1	2	1	2	20.541	0	1	0	3
180	0	58	2	1	3	1	1	23.1892	0	0	0	3
181	1	58	1	2	1	1	1	20.5342	0	1	0	1
182	1	62	2	0	1	1	1	22.833	0	1	0	3
183	0	55	2	1	0	1	1	20.3964	0	0	0	1
184	0	68	1	1	3	1	3	16.5775	0	1	1	2
185	0	52	1	2	3	1	2	23.4879	0	1	0	2
186	1	66	1	2	3	1	3	20.1736	0	1	1	2
187	1	59	3	1	2	1	2	23.5726	0	0	0	1
188	1	66	1	2	1	1	2	24.3344	0	1	1	3
189	1	65	3	2	3	1	3	26.8749	1	1	1	2
190	0	63	1	0	1	0	3	21.9944	0	1	0	2
191	0	61	3	1	1	1	1	28.0632	0	1	0	2
192	1	48	1	1	0	1	2	17.2111	0	0	0	1
193	0	68	1	2	1	1	1	26.2235	0	0	0	3
194	1	60	2	1	1	1	2	20.9189	1	1	0	1
195	1	68	2	2	4	1	2	22.3986	0	1	1	3
196	1	31	2	2	1	1	1	24.1262	0	1	0	1
197	1	48	1	2	2	0	1	18.4045	0	1	0	3
198	1	63	1	1	4	1	3	25.2754	1	1	0	2
199	1	64	2	0	3	1	2	23.394	0	0	0	2
200	1	65	2	1	1	1	2	23.1629	0	0	0	3
201	1	63	1	2	3	0	3	21.1521	0	1	1	2
202	0	49	2	1	2	1	1	21.4976	1	0	0	2
203	1	67	1	1	2	1	1	18.5816	1	1	0	1
204	0	43	2	1	0	1	2	20.6781	1	1	0	2
205	0	65	1	2	0	1	3	19.5657	0	1	1	3
206	0	41	1	2	0	1	1	23.1746	0	1	0	2
207	1	62	1	0	0	1	2	24.193	0	0	1	3
208	0	73	3	1	4	1	1	18.3325	0	0	0	3
209	1	62	1	1	3	1	1	18.302	0	1	0	3
210	1	65	3	1	3	1	1	24.7475	0	1	1	3
211	1	57	1	2	0	1	2	20.1827	1	0	0	1
212	0	58	1	1	3	1	1	20.3768	0	0	0	2
213	1	59	1	1	1	1	1	20.8801	0	1	0	2
214	0	55	2	1	2	0	1	26.3371	0	0	0	3
215	1	64	1	2	3	1	2	20.5566	1	0	1	3
216	1	60	2	1	1	1	1	23.4223	1	1	0	2
217	0	65	1	0	2	0	3	25.7017	0	1	1	2
218	0	52	2	2	1	1	1	22.5362	0	1	0	1
219	1	66	1	2	4	1	2	19.2856	0	1	1	3
220	1	64	1	1	3	1	1	23.6803	0	1	1	2
221	1	60	2	2	0	1	1	16.9697	0	0	0	1
222	1	71	1	1	2	1	1	18.7172	0	1	0	3
223	1	63	1	1	3	1	1	14.3852	0	0	0	3
224	1	64	3	2	0	1	1	25.1065	1	0	0	3
225	0	61	2	1	0	1	3	29.1372	1	1	0	1
226	1	62	1	2	1	0	2	23.0809	1	1	1	2
227	0	69	2	1	1	1	2	23.1653	0	0	0	1
228	1	59	1	2	2	1	1	25.4456	0	1	0	2
229	1	69	1	2	3	1	1	18.5461	0	1	1	1
230	0	57	1	1	1	1	1	19.051	0	1	0	3
231	1	72	2	1	2	1	1	19.1305	0	1	0	1
232	0	70	2	2	1	1	2	18.0032	1	1	0	1
233	0	65	1	2	0	1	2	26.7756	0	0	0	1
234	1	42	1	2	1	1	1	19.8806	1	0	0	3
235	1	34	1	2	1	1	3	23.001	0	1	0	1
236	0	63	1	0	3	1	2	23.4985	0	0	1	2
237	1	63	2	1	3	0	3	20.6292	1	1	1	3
238	0	64	2	2	0	1	2	14.0082	0	0	0	3
239	0	61	1	1	1	1	2	22.9008	1	1	0	3
240	1	62	1	1	0	1	1	23.6529	0	1	0	1
241	0	63	1	2	3	1	2	20.7704	1	0	1	2
242	0	70	1	2	4	1	2	21.5643	0	1	1	3
243	0	40	1	1	0	1	2	18.9819	0	0	0	3
244	1	34	1	1	2	1	2	22.2551	0	1	0	1
245	1	61	1	2	3	1	1	20.1766	0	1	0	1
246	1	41	1	1	1	1	1	21.7976	0	0	0	2
247	1	43	2	0	1	1	1	23.5549	1	1	0	1
248	1	50	1	0	0	1	3	17.623	0	1	0	2
249	0	55	1	2	1	0	1	26.8886	0	1	0	3
250	1	73	3	1	0	1	2	14.9715	0	0	0	2
251	1	35	1	1	0	1	1	21.3189	1	0	0	2
252	0	34	2	1	1	1	1	21.2109	0	1	0	2
253	1	63	1	1	2	1	2	18.7549	0	0	0	3
254	1	68	1	2	3	1	1	20.1092	0	1	1	3
255	1	65	2	2	1	1	2	28.8938	0	0	0	1
256	1	61	3	2	0	1	1	28.7756	0	1	0	2
257	1	66	2	2	2	1	2	22.3076	0	1	1	3
258	1	58	1	1	3	0	2	22.8974	0	1	1	2
259	1	59	1	1	0	1	1	25.2868	0	0	0	2
260	1	71	2	1	2	1	3	14.26	1	0	0	1
261	1	55	1	1	2	1	2	18.5613	0	1	0	2
262	0	67	2	1	2	1	3	16.4229	0	1	0	2
263	1	67	1	2	4	1	3	26.6255	1	1	1	2
264	1	51	1	2	2	1	1	20.9887	0	1	0	2
265	1	63	1	2	2	1	1	23.0529	0	0	0	1
266	0	55	1	1	1	0	2	20.022	0	0	0	2
267	0	62	3	0	1	1	2	24.0347	1	1	0	2
268	0	71	1	2	1	1	2	22.2162	0	0	0	1
269	1	64	3	1	0	1	1	25.2114	0	1	0	2
270	0	68	2	0	0	1	1	20.2545	0	0	0	2
271	0	54	1	1	1	1	2	27.006	0	0	0	1
272	1	65	3	2	1	0	2	22.1012	0	1	1	1
273	1	62	1	1	4	1	1	14.1078	0	1	0	2
274	0	67	1	2	4	0	2	18.8233	0	1	1	3
275	0	61	1	1	1	1	2	20.8055	0	0	0	1
276	0	61	1	2	1	1	3	22.0785	0	0	0	3
277	1	68	1	1	4	1	2	16.8732	0	1	1	3
278	1	63	2	0	1	1	1	17.3232	1	0	0	2
279	0	52	2	1	2	1	2	24.8293	0	0	0	1
280	1	63	1	1	1	1	2	16.8799	0	1	0	3
281	1	47	1	0	0	1	2	22.2452	0	1	0	1
282	0	41	1	1	0	1	2	17.7936	0	1	0	1
283	1	51	2	2	1	1	2	19.0532	1	1	0	2
284	1	48	1	1	1	1	2	18.1763	0	1	0	3
285	1	70	2	1	1	1	1	21.7314	0	0	0	2
286	0	34	1	2	1	1	1	18.8957	0	0	0	1
287	1	67	1	0	4	1	1	25.6013	0	0	1	2
288	1	41	1	1	1	1	1	26.9439	0	1	0	1
289	0	44	2	1	2	1	1	19.2635	1	0	0	2
