# Supplementary material for: Constructing a prognostic tool for predicting the risk of non-adherence to antiplatelet therapy in discharged patients with coronary heart disease: a retrospective cohort study
Source: PeerJ. 2023 Aug 9;11:e15876. doi: 10.7717/peerj.15876 (PMC10422952; doi:10.7717/peerj.15876)
Supplement: Supplemental Information 2 [file peerj-11-15876-s002.xlsx]

## Sheet: Sheet2
Variables	Value code	Annotation
id
Gender
	0	Female
	1	Male
Age
Educational level
	1	Junior high school and below
	2	Senior high school and technical secondary school
	3	College degree or above
Medical payment method
	0	At one's own expense
	1	Resident medical insurance
	2	Employee medical insurance
Number of combined risk factors
	0	0
	1	1
	2	2
	3	3
	4	4
PCI or not
	0	No
	1	Yes
Type of coronary heart disease
	1	Stable angina pectoris
	2	Unstable angina pectoris
	3	Acute myocardial infarction
BMI
Occupational status
	0	Unemployed or retired
	1	On the job
Type of drugs taken at discharge
	0	1-2 species
	1	3 or more
Duration of antiplatelet medication
	1	<2 years
	2	2-5 year
	3	>5 years
Outcome
	0	Adherence group
	1	Non-adherence group
